# Supplementary material for: Role of Sterically Bulky Azobenzenes in the Molecular Assembly of Pyrene Derivatives: Rectangular Sheet-like Structures and Their Emission Characteristics
Source: MDPI journal article supplement (doi:10.3390/ijms24054504), 2023-02-24
Supplement: s1 [file s1]

# Role of Sterically Bulky Azobenzenes in the Molecular Assembly of Pyrene Derivatives: Rectangular Sheet-like Structures and Their Emission Characteristics

Pyae Thu and Mina Han

## Contents

**Figure S1.** Changes in absorbances at 365 and 450 nm upon alternating irradiation with UV and blue light.

**Figure S2.** (a) Absorption spectra of **AzPy** in 50  $\mu\text{M}$  DMF and DMF- $\text{H}_2\text{O}$ . (b) Fluorescence spectra in 20  $\mu\text{M}$  DMF and DMF- $\text{H}_2\text{O}$ . (c) Plot of the length distribution of sheet-like structures obtained from 50  $\mu\text{M}$  DMF- $\text{H}_2\text{O}$  mixed turbid solution. (d) SEM image of incomplete thin structures.

**Figure S3.** OM image of incomplete rectangular structures obtained from a 20  $\mu\text{M}$  DMF- $\text{H}_2\text{O}$  mixed suspension.

**Figure S4.** (a) Absorption spectra of **AzPy** in 100  $\mu\text{M}$  DMF and DMF- $\text{H}_2\text{O}$  (1/1, v/v). (b) Fluorescence spectra of 100 and 920  $\mu\text{M}$  (in DMF and DMF- $\text{H}_2\text{O}$ ).

**Figure S5.** Absorption spectra of **PyOH** in DMF (20  $\mu\text{M}$ ) and DMF- $\text{H}_2\text{O}$  (1/4, v/v, 40  $\mu\text{M}$ ).

**Figure S6.** Absorption spectral changes of **AzPy** in DMF- $\text{H}_2\text{O}$  (1/1, v/v, 50  $\mu\text{M}$ ) as a function of exposure time of UV light.

**Figure S7.**  $^1\text{H}$  NMR spectrum of **AzPy**.

**Figure S8.**  $^{13}\text{C}$  NMR spectrum of **AzPy**.

**Figure S9.** Synthesis of **PyBr** and its NMR data.

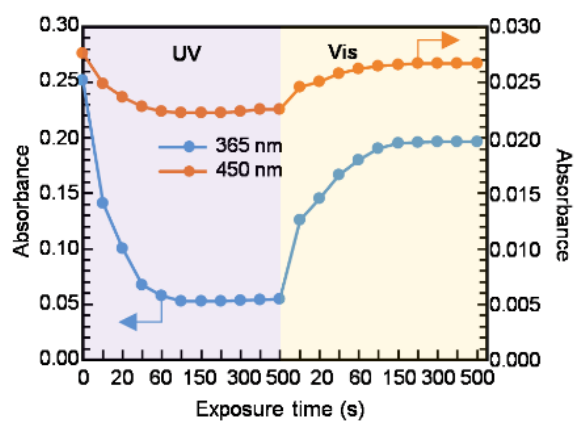

**Figure S1.** Changes in absorbances at 365 and 450 nm upon alternating irradiation with UV and blue light.

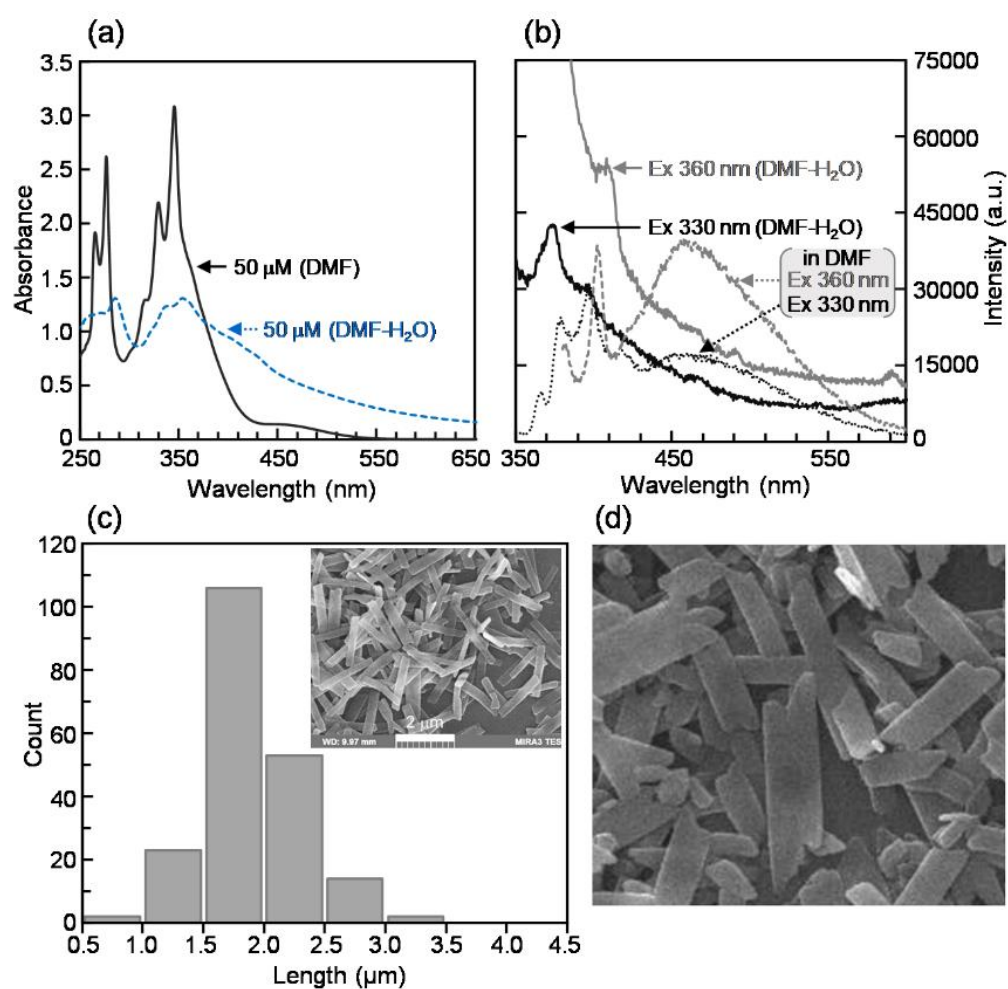

**Figure S2.** (a) Absorption spectra of AzPy in 50  $\mu\text{M}$  DMF and DMF- $\text{H}_2\text{O}$  (1/1, v/v). (b) Fluorescence spectra in 20  $\mu\text{M}$  DMF and DMF- $\text{H}_2\text{O}$  (1/3, v/v). (c) Plot of the length distribution of sheet-like structures obtained from 50  $\mu\text{M}$  DMF- $\text{H}_2\text{O}$  mixed turbid solution (counting 200 aggregates). (d) SEM image of incomplete thin structures. These aggregates seem to be formed in the early stage of self-assembly.

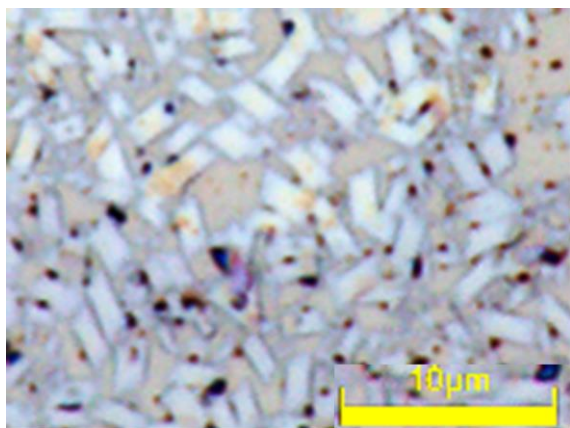

**Figure S3.** OM image of incomplete rectangular structures obtained from a 20  $\mu\text{M}$  DMF- $\text{H}_2\text{O}$  mixed suspension.

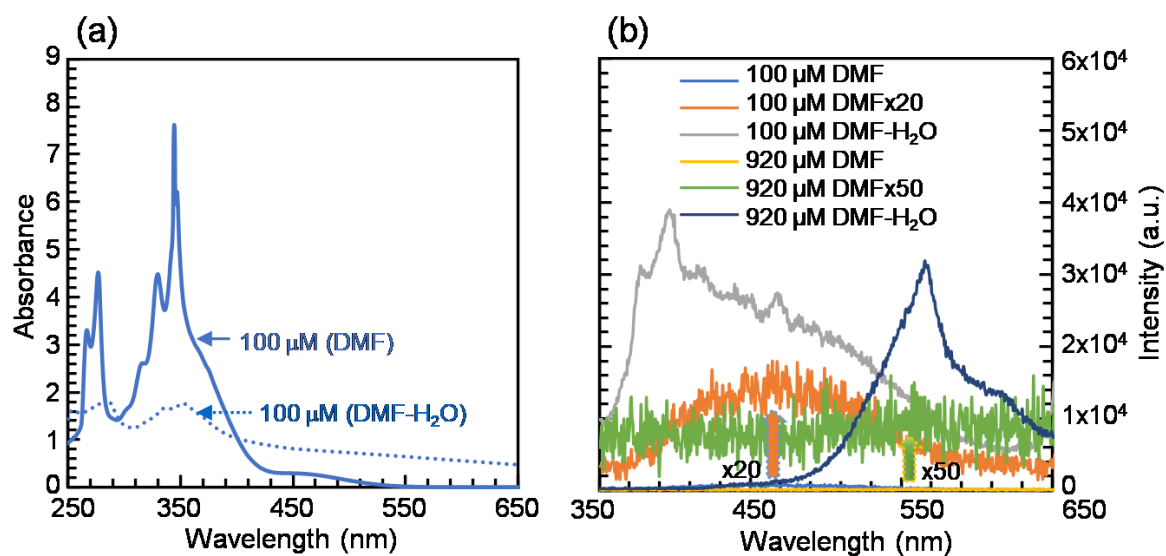

**Figure S4.** (a) Absorption spectra of AzPy in 100  $\mu\text{M}$  DMF and DMF- $\text{H}_2\text{O}$  (1/1, v/v). (b) Fluorescence spectra of 100 and 920  $\mu\text{M}$  (in DMF and DMF- $\text{H}_2\text{O}$ ).

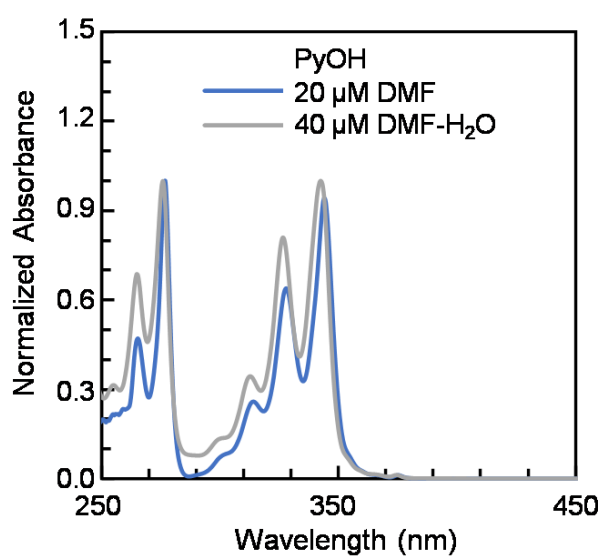

**Figure S5.** Absorption spectra of **PyOH** in DMF (20  $\mu\text{M}$ ) and DMF- $\text{H}_2\text{O}$  (1/4, v/v, 40  $\mu\text{M}$ ).

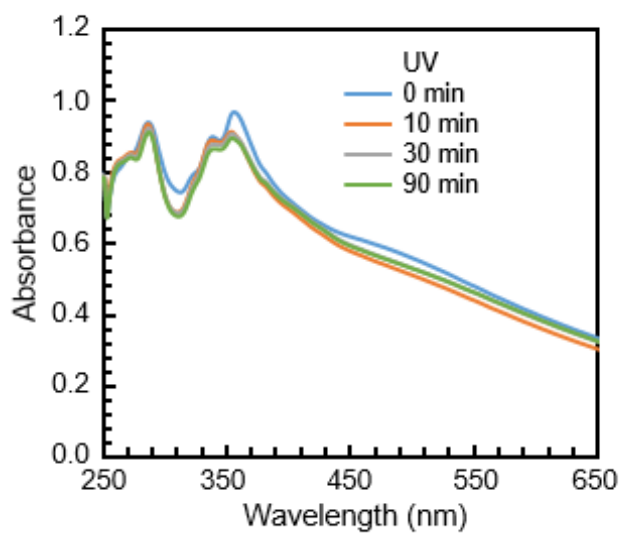

**Figure S6.** Absorption spectral changes of **AzPy** in DMF- $\text{H}_2\text{O}$  (1/1, v/v, 50  $\mu\text{M}$ ) as a function of exposure time of UV light.

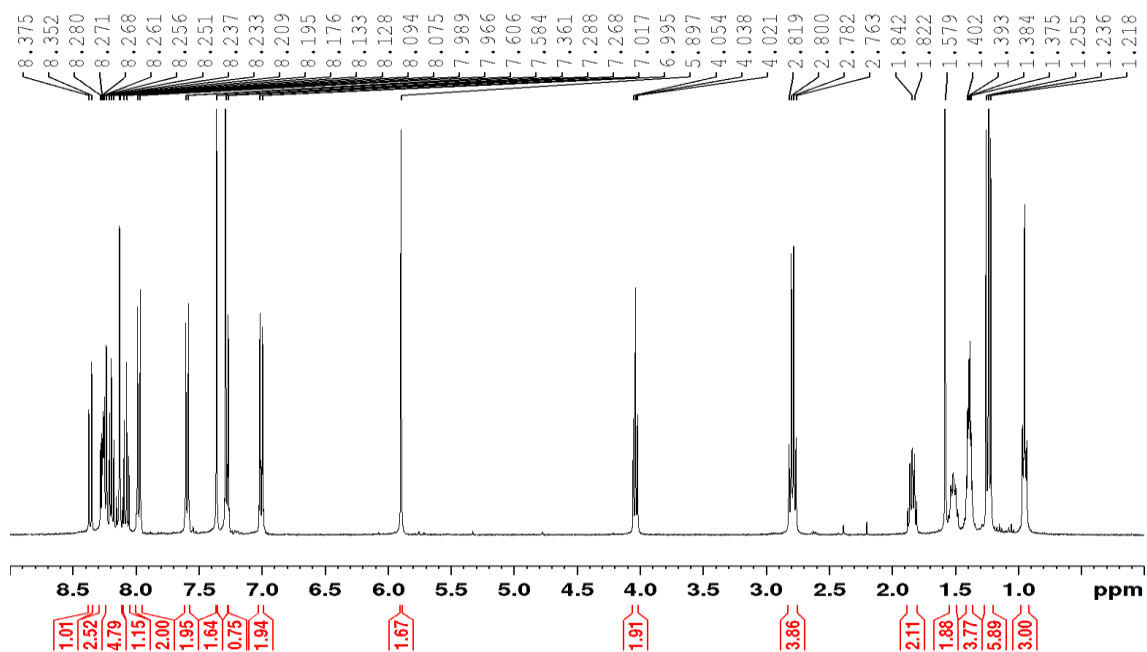

Figure S7. <sup>1</sup>H NMR spectrum of AzPy (in CDCl<sub>3</sub>).

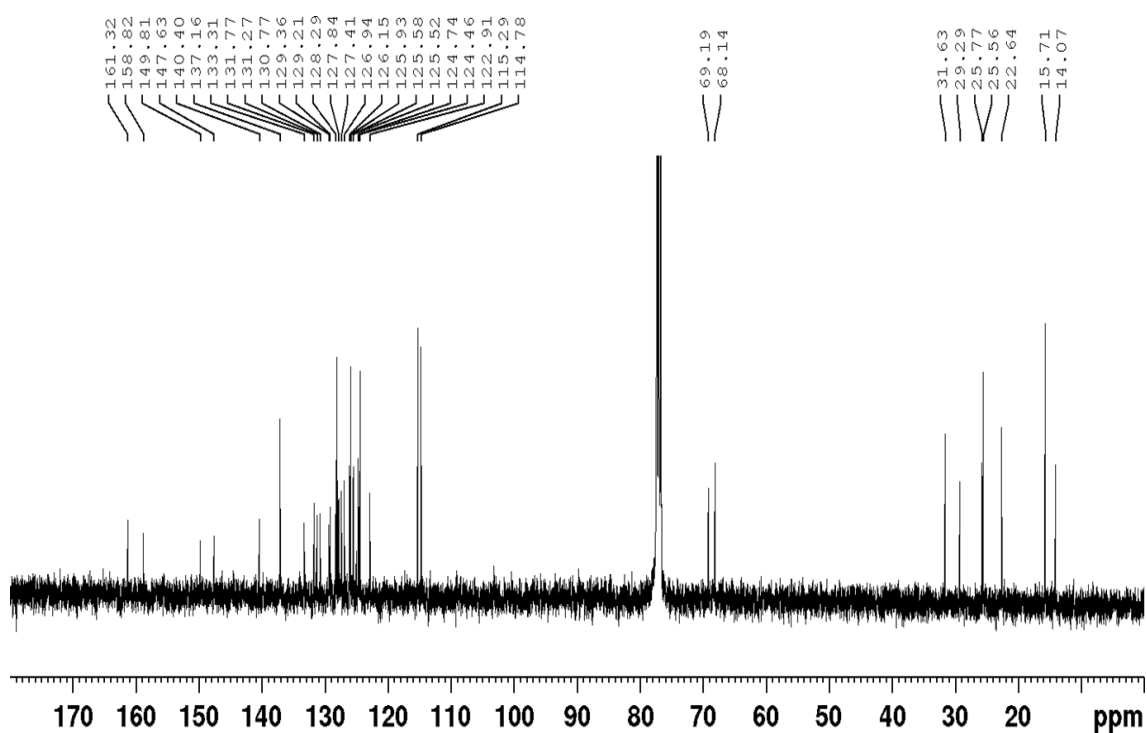

Figure S8. <sup>13</sup>C NMR spectrum of AzPy (in CDCl<sub>3</sub>).

## Synthesis of 1-Bromomethylpyrene (**PyBr**) [1]

Phosphorus tribromide (0.87 g, 3.23 mmol) was added to a suspension of commercial 1-pyrenemethanol (0.50 g, 2.15 mmol) in 5 mL of dry THF and stirred at room temperature for 2 h. The resulting mixture was washed with Et<sub>2</sub>O and dried. The yellow solid (0.26 g, yield: 41 %) was obtained. <sup>1</sup>H NMR (400 MHz, CDCl<sub>3</sub>) δ 8.31 (d, 1H, PyH), 8.15 (m, 3H, PyH), 7.98 (m, 5H, PyH), 5.18 (s, 2H, PyCH<sub>2</sub>).

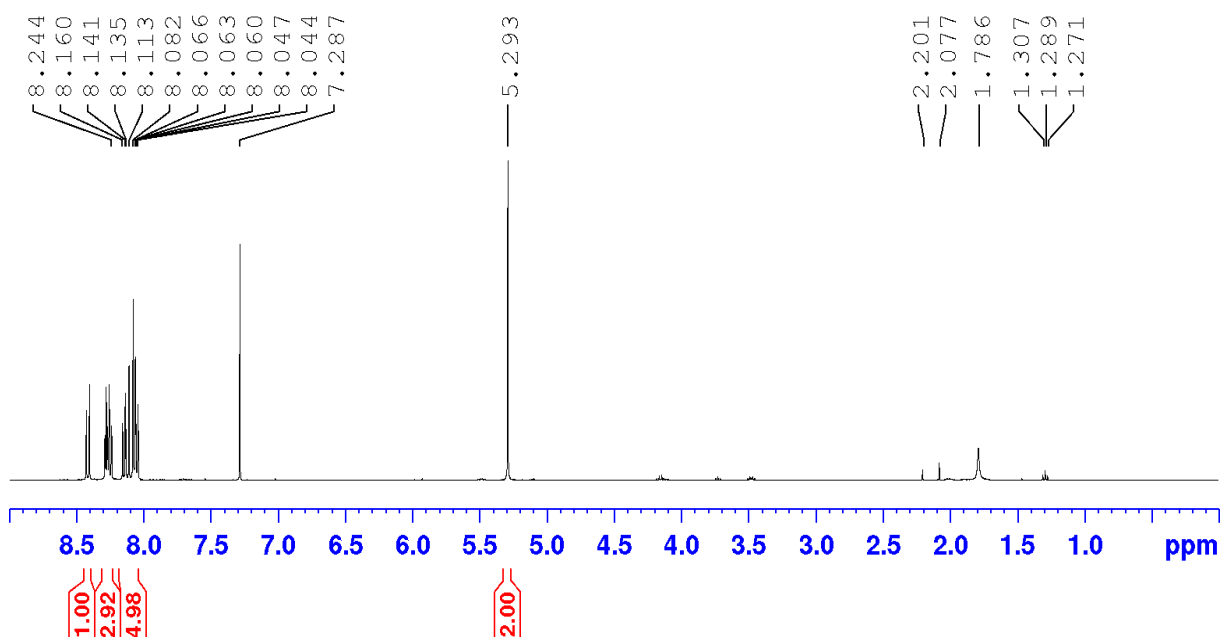

**Figure S9.** <sup>1</sup>H NMR spectrum of **PyBr** (in CDCl<sub>3</sub>).

## Reference

1. Park, S.Y.; Yoon, J.H.; Hong, C.S.; Souane, R.; Kim, J.S.; Matthews, S.E.; Vicens, J. A Pyrenyl-Appended Triazole-Based Calix [4] Arene as a Fluorescent Sensor for Cd<sup>2+</sup> and Zn<sup>2+</sup>. *J. Org. Chem.* **2008**, *73*, 8212-8218.
